# Supplementary material for: Extrinsic and intrinsic signals converge on the Runx1/CBFβ transcription factor for nonpeptidergic nociceptor maturation
Source: eLife journal article supplement (doi:10.7554/elife.10874), 2015-09-29
Supplement: supp [file elife-10874-supp-v1.zip]

**Table S1. Microarray analysis of genes that are differentially expressed in E16.5 DRGs of control and *Runx1* CKO animals.** Shown are genes with a fold change greater than or equal to 1.5, and a p-value less than or equal to 0.05. Genes that exhibited reduced or increased expression in *Runx1* CKO DRGs relative to control are shown in table S1.1 and S1.2, respectively.

**Table S1.1**

| Probe Set ID | Gene Symbol       | Gene Title                                                         | Fold Change | P-value      |
|--------------|-------------------|--------------------------------------------------------------------|-------------|--------------|
| 1443392_at   | Trpv1             | transient receptor potential cation channel, subfamily V, member 1 | 3.855363    | 0.00036<br>4 |
| 1418723_at   | Lpar3             | lysophosphatidic acid receptor 3                                   | 3.150196    | 0.01752<br>8 |
| 1424633_at   | Camk1g            | calcium/calmodulin-dependent protein kinase I gamma                | 2.943805    | 0.00352<br>7 |
| 1448459_at   | Kcnip1            | Kv channel-interacting protein 1                                   | 2.265259    | 0.03317      |
| 1443959_at   | Tmem72            | transmembrane protein 72                                           | 2.163699    | 0.00324<br>9 |
| 1438112_at   | 9430021M05Ri<br>k | RIKEN cDNA 9430021M05 gene                                         | 2.14351     | 0.00782<br>4 |
| 1436100_at   | Sh2d5             | SH2 domain containing 5                                            | 2.11848     | 0.03425      |
| 1441363_at   | Frmpd3            | FERM and PDZ domain containing 3                                   | 2.078189    | 0.03923<br>6 |

|                  |         |                                                                      |          |              |
|------------------|---------|----------------------------------------------------------------------|----------|--------------|
| 1435772_at       | Kif21b  | kinesin family member 21B                                            | 2.015971 | 0.00020<br>4 |
| 1416456_a_a<br>t | Chia    | chitinase, acidic                                                    | 2.005046 | 0.02808<br>7 |
| 1416785_at       | Kcnip1  | Kv channel-interacting protein 1                                     | 1.996721 | 0.00274<br>3 |
| 1419654_at       | Tle3    | transducin-like enhancer of split 3,<br>homolog of Drosophila E(spl) | 1.934638 | 0.04911<br>5 |
| 1428074_at       | Tmem158 | transmembrane protein 158                                            | 1.902171 | 0.04119<br>9 |
| 1420564_at       | Insrr   | insulin receptor-related receptor                                    | 1.868479 | 0.00946<br>8 |
| 1452263_at       | Slc35f4 | solute carrier family 35, member F4                                  | 1.823904 | 0.01666<br>7 |
| 1451062_a_a<br>t | Pex5l   | peroxisomal biogenesis factor 5-like                                 | 1.819641 | 0.02957<br>7 |
| 1434635_at       | Rph3a   | rabphilin 3A                                                         | 1.803495 | 0.03609<br>1 |
| 1455000_at       | Gpr68   | G protein-coupled receptor 68                                        | 1.779183 | 0.03303<br>6 |
| 1450224_at       | Col4a3  | collagen, type IV, alpha 3                                           | 1.762817 | 0.02183<br>8 |
| 1438160_x_a      | Slco4a1 | solute carrier organic anion                                         | 1.745016 | 0.04389      |

|                  |                         |                                                                                        |          |              |
|------------------|-------------------------|----------------------------------------------------------------------------------------|----------|--------------|
| t                |                         | transporter family, member 4a1                                                         |          | 8            |
| 1425483_at       | LOC100044677<br>/// Tox | similar to thymus high mobility<br>group box protein TOX /// thymocyte<br>selection-as | 1.744519 | 0.02611<br>9 |
| 1419655_at       | Tle3                    | transducin-like enhancer of split 3,<br>homolog of Drosophila E(spl)                   | 1.716283 | 0.02622<br>6 |
| 1429805_at       | Myo1a                   | myosin IA                                                                              | 1.714405 | 0.00056<br>9 |
| 1433988_s_a<br>t | C230098O21Ri<br>k       | RIKEN cDNA C230098O21 gene                                                             | 1.707104 | 0.04415<br>4 |
| 1440056_at       | ---                     | ---                                                                                    | 1.672219 | 0.00193<br>1 |
| 1424923_at       | Serpina3g               | serine (or cysteine) peptidase<br>inhibitor, clade A, member 3G                        | 1.65806  | 0.00216<br>4 |
| 1421037_at       | Npas2                   | neuronal PAS domain protein 2                                                          | 1.654117 | 0.02777<br>4 |
| 1445941_at       | ---                     | ---                                                                                    | 1.650902 | 0.02853      |
| 1417542_at       | Rps6ka2                 | ribosomal protein S6 kinase,<br>polypeptide 2                                          | 1.646436 | 0.02077<br>4 |
| 1422710_a_a<br>t | Cacna1h                 | calcium channel, voltage-dependent,<br>T type, alpha 1H subunit                        | 1.629623 | 0.02476<br>6 |
| 1436013_at       | Gsg1l                   | GSG1-like                                                                              | 1.602431 | 0.00299<br>7 |

|                  |                          |                                                                                |          |              |
|------------------|--------------------------|--------------------------------------------------------------------------------|----------|--------------|
| 1417392_a_a<br>t | Slc7a7                   | solute carrier family 7 (cationic amino acid transporter, y+ system), member 7 | 1.598559 | 0.04868<br>1 |
| 1453801_at       | Them5                    | thioesterase superfamily member 5                                              | 1.595386 | 0.02138<br>5 |
| 1431852_at       | A730035I17Rik            | RIKEN cDNA A730035I17 gene                                                     | 1.584555 | 0.00085<br>4 |
| 1441298_at       | ---                      | ---                                                                            | 1.565934 | 0.03989<br>3 |
| 1450174_at       | Ptprt                    | protein tyrosine phosphatase, receptor type, T                                 | 1.557751 | 0.02724<br>1 |
| 1430159_at       | 5830408C22Rik            | RIKEN cDNA 5830408C22 gene                                                     | 1.520074 | 0.03931<br>8 |
| 1456047_at       | LOC433466 ///<br>Pla2g4b | phospholipase A2, group IVB (cytosolic)                                        | 1.517543 | 0.04928<br>4 |
| 1438055_at       | Rarres1                  | retinoic acid receptor responder (tazarotene induced) 1                        | 1.511225 | 0.02733      |
| 1457128_at       | AL024213                 | expressed sequence AL024213                                                    | 1.508931 | 0.04055<br>5 |

**Table S1.2**

| <b>Probe Set ID</b> | <b>Gene Symbol</b> | <b>Gene Title</b> | <b>Fold Change</b> | <b>P -Value</b> |
|---------------------|--------------------|-------------------|--------------------|-----------------|
|---------------------|--------------------|-------------------|--------------------|-----------------|

|                  |                           |                                                                                  |          |              |
|------------------|---------------------------|----------------------------------------------------------------------------------|----------|--------------|
| 1455931_at       | Chrna3                    | cholinergic receptor, nicotinic, alpha polypeptide 3                             | 4.589469 | 0.03047<br>5 |
| 1417256_at       | Mmp13                     | matrix metalloproteinase 13                                                      | 3.542615 | 0.01981<br>4 |
| 1433607_at       | Cbln4                     | cerebellin 4 precursor protein                                                   | 3.482604 | 0.01162<br>5 |
| 1435424_x_a<br>t | ---                       | ---                                                                              | 3.416324 | 0.00109<br>2 |
| 1433551_at       | Vat1l                     | vesicle amine transport protein 1 homolog-like (T. californica)                  | 3.278425 | 0.01854<br>8 |
| 1440484_at       | Unc5d                     | unc-5 homolog D (C. elegans)                                                     | 3.169972 | 0.00250<br>8 |
| 1441329_at       | Galr1                     | galanin receptor 1                                                               | 3.067817 | 0.00084<br>3 |
| 1452010_at       | Chrna3                    | cholinergic receptor, nicotinic, alpha polypeptide 3                             | 2.952662 | 0.00011<br>2 |
| 1451263_a_a<br>t | Fabp4                     | fatty acid binding protein 4, adipocyte                                          | 2.837796 | 0.035        |
| 1417023_a_a<br>t | Fabp4                     | fatty acid binding protein 4, adipocyte                                          | 2.716484 | 0.03439<br>5 |
| 1439272_at       | Lcorl ///<br>LOC100046011 | ligand dependent nuclear receptor corepressor-like /// hypothetical protein LOC1 | 2.610205 | 0.04198      |

|              |               |                                                                        |          |              |
|--------------|---------------|------------------------------------------------------------------------|----------|--------------|
| 1416468_at   | Aldh1a1       | aldehyde dehydrogenase family 1,<br>subfamily A1                       | 2.508498 | 0.04671<br>1 |
| 1437695_at   | Prokr2        | prokineticin receptor 2                                                | 2.473296 | 0.04534<br>1 |
| 1443365_at   | Htr4          | 5 hydroxytryptamine (serotonin)<br>receptor 4                          | 2.377891 | 0.04330<br>1 |
| 1430107_at   | Acbd7         | acyl-Coenzyme A binding domain<br>containing 7                         | 2.213863 | 0.00656<br>9 |
| 1417680_at   | Kcna5         | potassium voltage-gated channel,<br>shaker-related subfamily, member 5 | 2.065996 | 0.03374<br>9 |
| 1439887_at   | ---           | ---                                                                    | 2.048765 | 0.00727<br>3 |
| 1449254_at   | Spp1          | secreted phosphoprotein 1                                              | 2.038316 | 0.04484<br>4 |
| 1418304_at   | Pcdh21        | protocadherin 21                                                       | 2.020208 | 0.01101<br>7 |
| 1457008_at   | Chrb4         | cholinergic receptor, nicotinic, beta<br>polypeptide 4                 | 1.957697 | 0.01648<br>7 |
| 1419756_at   | Dgkg          | diacylglycerol kinase, gamma                                           | 1.914247 | 0.03918<br>3 |
| 1436761_s_at | 1200015N20Rik | RIKEN cDNA 1200015N20 gene                                             | 1.891189 | 0.01325      |
| 1456233_at   | ---           | ---                                                                    | 1.871748 | 0.02684<br>1 |

|              |               |                                                               |          |              |
|--------------|---------------|---------------------------------------------------------------|----------|--------------|
| 1440531_at   | Rbm11         | RNA binding motif protein 11                                  | 1.870702 | 0.04585<br>2 |
| 1456609_at   | Camk2n1       | calcium/calmodulin-dependent<br>protein kinase II inhibitor 1 | 1.868836 | 0.00293<br>9 |
| 1443322_at   | ---           | ---                                                           | 1.868507 | 0.01830<br>1 |
| 1437883_s_at | ---           | ---                                                           | 1.84781  | 0.04731<br>1 |
| 1452004_at   | Calca         | calcitonin/calcitonin-related<br>polypeptide, alpha           | 1.846593 | 0.03499<br>4 |
| 1442379_at   | EG574403      | predicted gene, EG574403                                      | 1.834135 | 0.04986<br>2 |
| 1436444_at   | 6030405A18Rik | RIKEN cDNA 6030405A18 gene                                    | 1.819695 | 0.01243      |
| 1436493_at   | BB181834      | expressed sequence BB181834                                   | 1.814729 | 0.00105<br>8 |
| 1437262_x_at | Bcas2         | breast carcinoma amplified sequence<br>2                      | 1.813717 | 0.04303<br>2 |
| 1424679_at   | Mab2111       | mab-21-like 1 (C. elegans)                                    | 1.8063   | 0.01242<br>4 |
| 1438698_at   | Tmem132c      | transmembrane protein 132C                                    | 1.80257  | 0.01279<br>1 |
| 1426222_s_at | Vwa5a         | von Willebrand factor A domain<br>containing 5A               | 1.799035 | 0.00840<br>1 |

|                  |                                        |                                                                                          |          |              |
|------------------|----------------------------------------|------------------------------------------------------------------------------------------|----------|--------------|
| 1434150_a_a<br>t | Higd1c ///<br>Mettl7a1 ///<br>Mettl7a2 | HIG1 domain family, member 1C ///<br>methyltransferase like 7A1 ///<br>methyltransferase | 1.793921 | 0.0031       |
| 1456397_at       | Cdh4                                   | cadherin 4                                                                               | 1.789226 | 0.00695<br>1 |
| 1437781_at       | Insm2                                  | insulinoma-associated 2                                                                  | 1.785904 | 0.04310<br>2 |
| 1445247_at       | C530044C16Rik                          | RIKEN cDNA C530044C16 gene                                                               | 1.77605  | 0.00847<br>3 |
| 1460244_at       | Upb1                                   | ureidopropionase, beta                                                                   | 1.764131 | 0.00543<br>2 |
| 1451033_a_a<br>t | Trpc4                                  | transient receptor potential cation<br>channel, subfamily C, member 4                    | 1.75628  | 0.03859<br>6 |
| 1449251_at       | Ndp                                    | Norrie disease (pseudoglioma)<br>(human)                                                 | 1.749063 | 0.02079<br>5 |
| 1460033_at       | C030002C11Rik                          | RIKEN cDNA C030002C11 gene                                                               | 1.73966  | 0.03520<br>7 |
| 1437800_at       | Edaradd                                | EDAR (ectodysplasin-A receptor)-<br>associated death domain                              | 1.738899 | 0.00891<br>4 |
| 1423571_at       | S1pr1                                  | sphingosine-1-phosphate receptor 1                                                       | 1.718975 | 0.04030<br>7 |
| 1423016_a_a<br>t | Gypa                                   | glycophorin A                                                                            | 1.709037 | 0.04810<br>6 |



|              |                                      |                                                                          |          |              |
|--------------|--------------------------------------|--------------------------------------------------------------------------|----------|--------------|
| 1429123_at   | Rab27a                               | RAB27A, member RAS oncogene family                                       | 1.70457  | 0.02282<br>7 |
| 1434297_at   | E130304F04Rik<br>///<br>LOC100040601 | RIKEN cDNA E130304F04 gene ///<br>hypothetical protein LOC100040601      | 1.69251  | 0.00360<br>4 |
| 1448421_s_at | Aspn                                 | asporin                                                                  | 1.656201 | 0.02869<br>7 |
| 1419599_s_at | Ms4a6d                               | membrane-spanning 4-domains, subfamily A, member 6D                      | 1.654013 | 0.04385<br>5 |
| 1445838_at   | ---                                  | ---                                                                      | 1.646932 | 0.04688<br>8 |
| 1449033_at   | Tnfrsf11b                            | tumor necrosis factor receptor superfamily, member 11b (osteoprotegerin) | 1.644202 | 0.03410<br>6 |
| 1421854_at   | Fgl2                                 | fibrinogen-like protein 2                                                | 1.640142 | 0.00012<br>7 |
| 1427313_at   | Ptgir                                | prostaglandin I receptor (IP)                                            | 1.636612 | 0.01807<br>2 |
| 1437989_at   | Pde8b                                | phosphodiesterase 8B                                                     | 1.624623 | 2.04E-05     |
| 1426937_at   | 6330406I15Rik                        | RIKEN cDNA 6330406I15 gene                                               | 1.601092 | 0.04924<br>8 |
| 1418454_at   | Mfap5                                | microfibrillar associated protein 5                                      | 1.593589 | 0.02105<br>1 |

|              |                   |                                                                      |          |              |
|--------------|-------------------|----------------------------------------------------------------------|----------|--------------|
| 1442082_at   | C3ar1             | complement component 3a receptor<br>1                                | 1.57566  | 0.04213<br>6 |
| 1418511_at   | Dpt               | dermatopontin                                                        | 1.573438 | 0.02628<br>2 |
| 1429197_s_at | Rabgap1l          | RAB GTPase activating protein 1-<br>like                             | 1.557097 | 0.02034<br>2 |
| 1419468_at   | Clec14a           | C-type lectin domain family 14,<br>member a                          | 1.548326 | 0.01202<br>9 |
| 1417012_at   | Sdc2              | syndecan 2                                                           | 1.538801 | 0.03282<br>2 |
| 1435616_at   | Cyp20a1           | cytochrome P450, family 20,<br>subfamily A, polypeptide 1            | 1.534345 | 0.04882<br>5 |
| 1457137_at   | ---               | ---                                                                  | 1.531957 | 0.04647      |
| 1424229_at   | Dyrk3             | dual-specificity tyrosine-(Y)-<br>phosphorylation regulated kinase 3 | 1.524185 | 0.03706<br>6 |
| 1426514_at   | 4631426J05Rik     | RIKEN cDNA 4631426J05 gene                                           | 1.50781  | 0.04772<br>5 |
| 1427319_at   | A230046K03Ri<br>k | RIKEN cDNA A230046K03 gene                                           | 1.506691 | 0.03640<br>2 |
| 1445767_at   | Ptprd             | protein tyrosine phosphatase,<br>receptor type, D                    | 1.501627 | 0.00102<br>5 |
