# Supplementary figures and images for: Extrinsic and intrinsic signals converge on the Runx1/CBFβ transcription factor for nonpeptidergic nociceptor maturation
Source: eLife journal article supplement (doi:10.7554/elife.10874), 2015-09-29

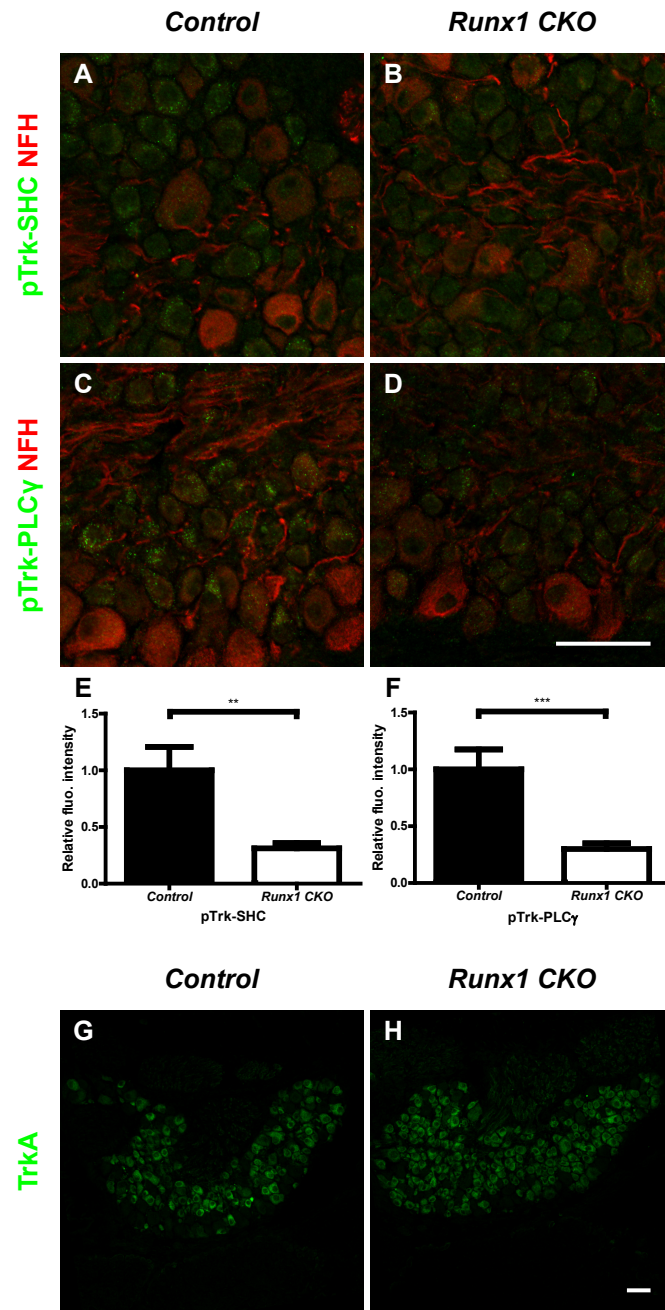

Supplement: supp [file elife-10874-supp-v1.zip]

**A**

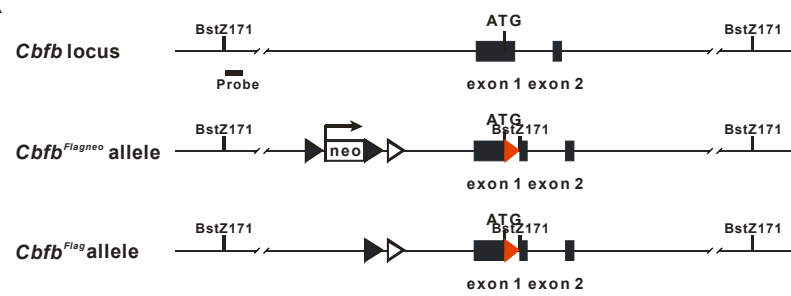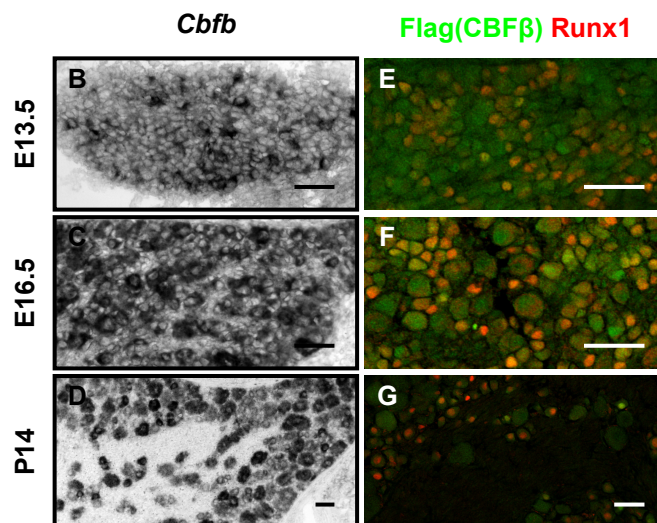

Supplement: supp [file elife-10874-supp-v1.zip]

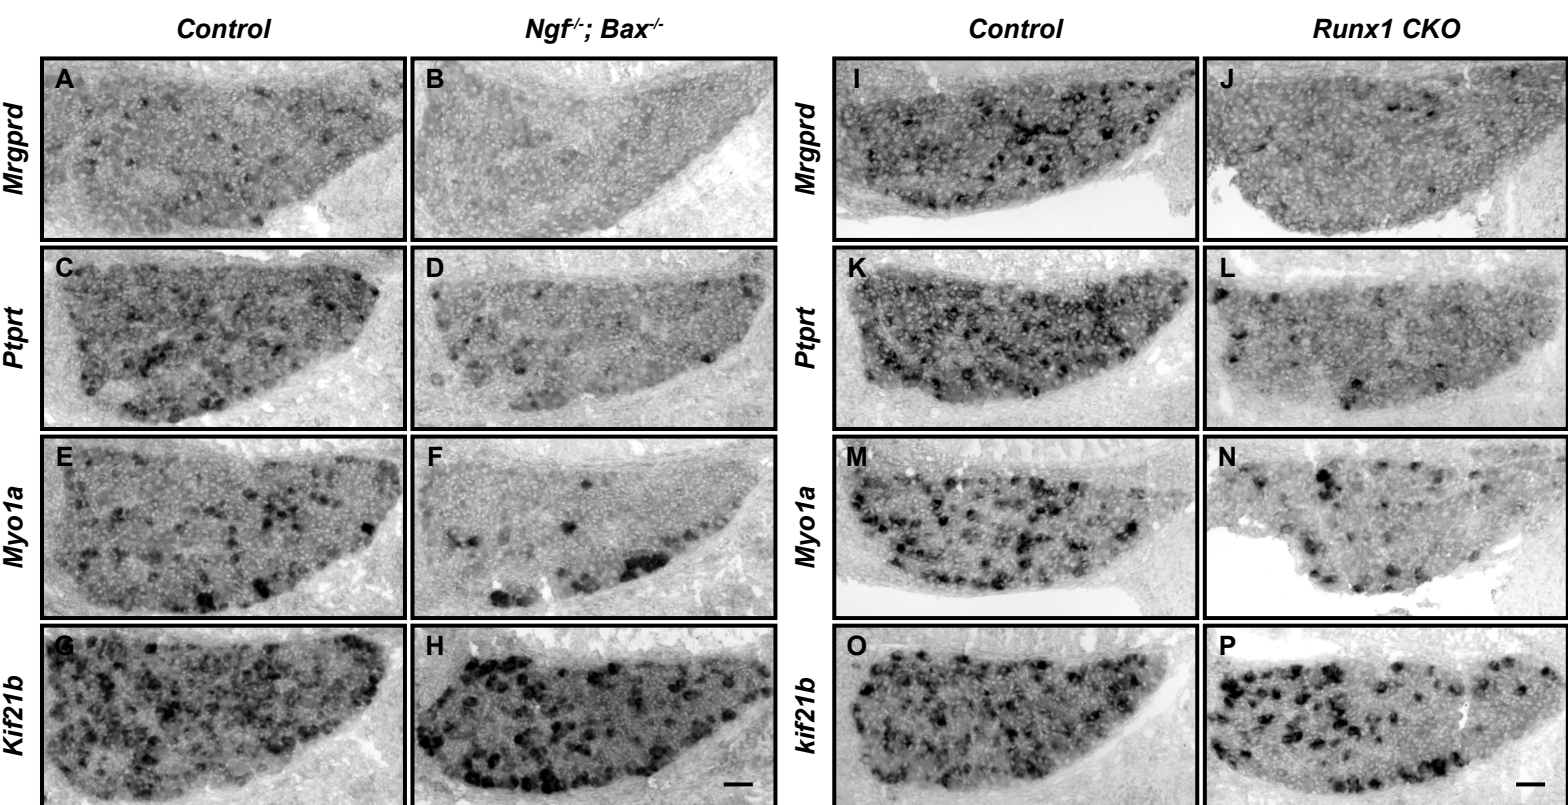

Supplement: supp [file elife-10874-supp-v1.zip]

A

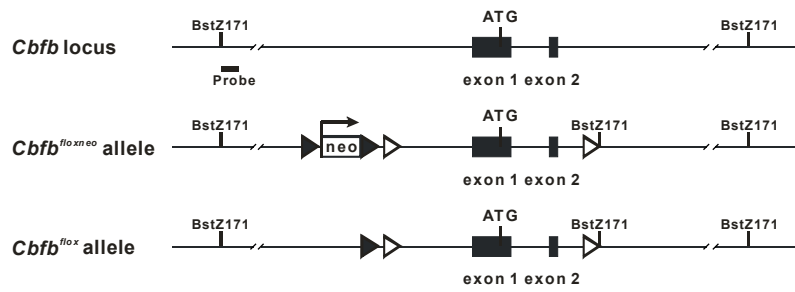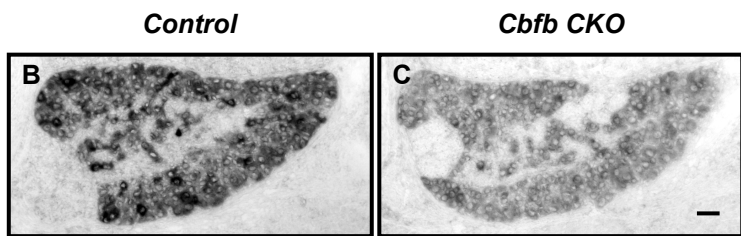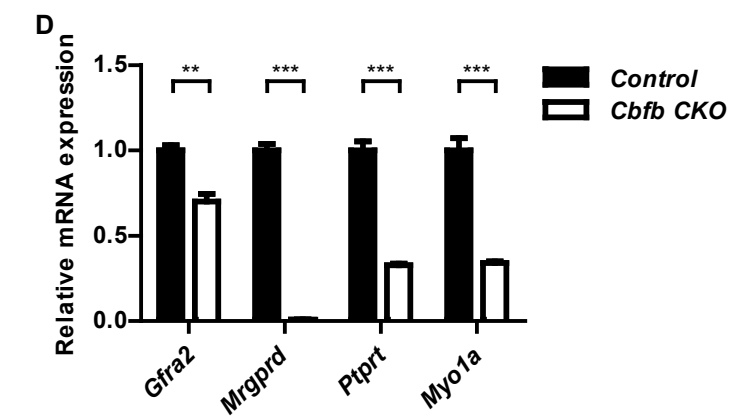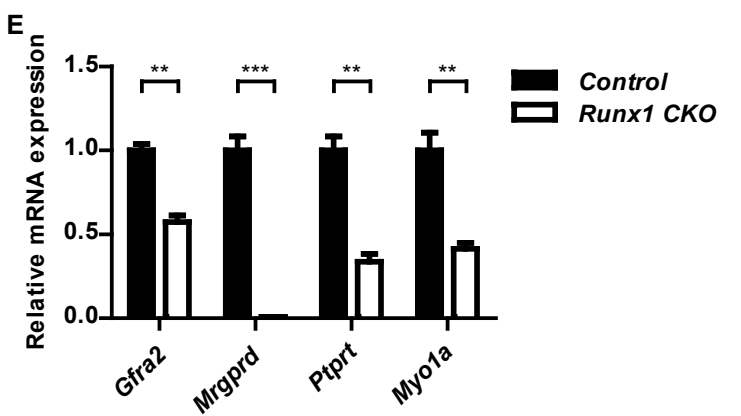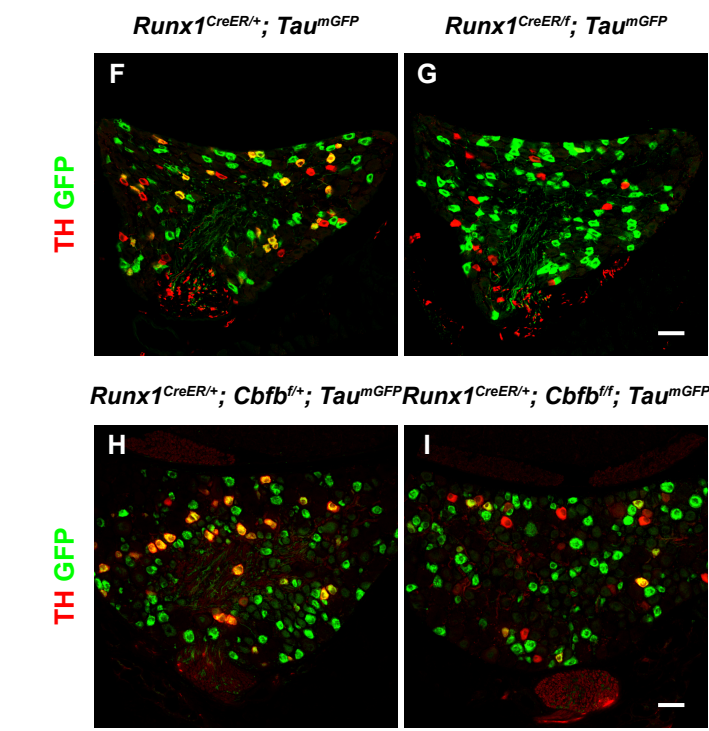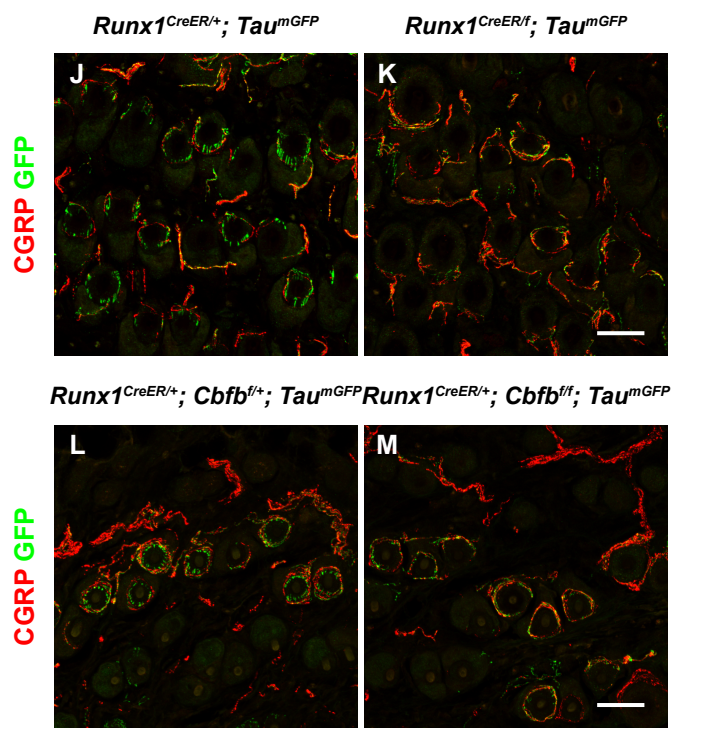

Supplement: supp [file elife-10874-supp-v1.zip]

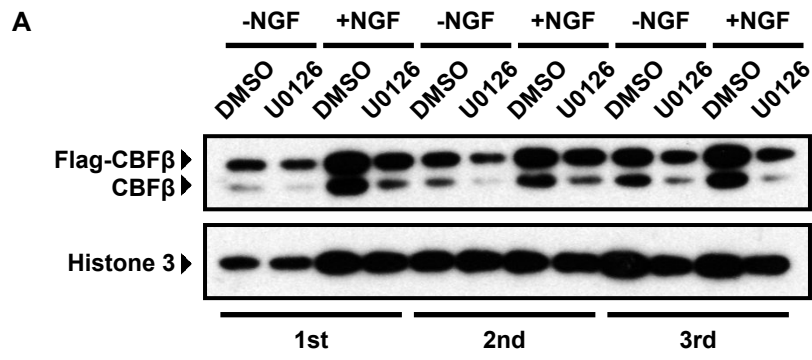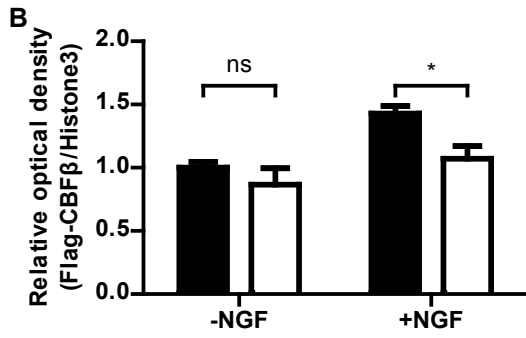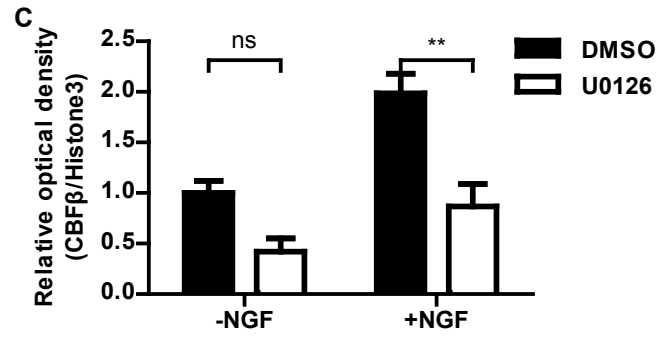

Supplement: supp [file elife-10874-supp-v1.zip]

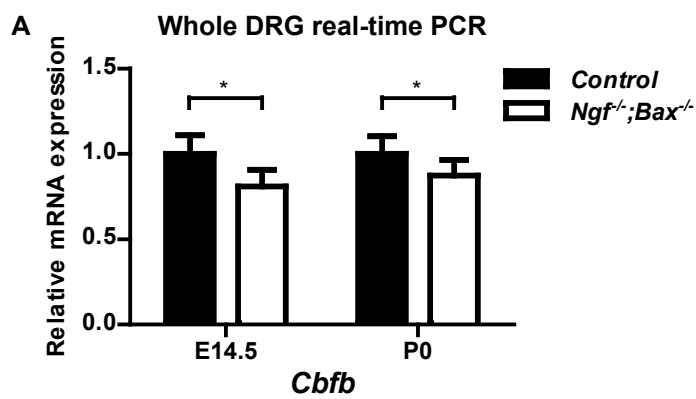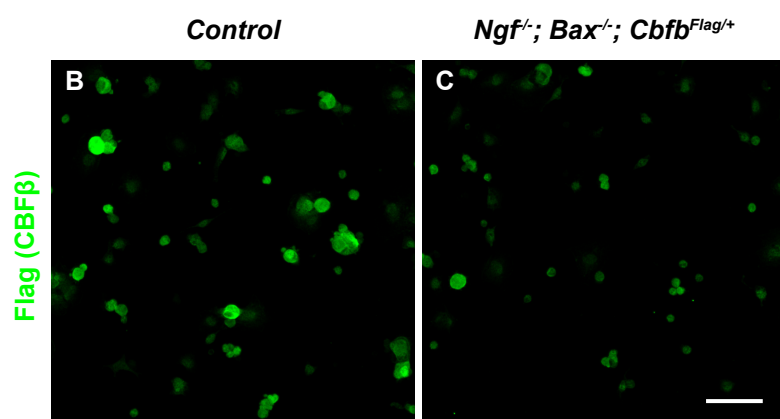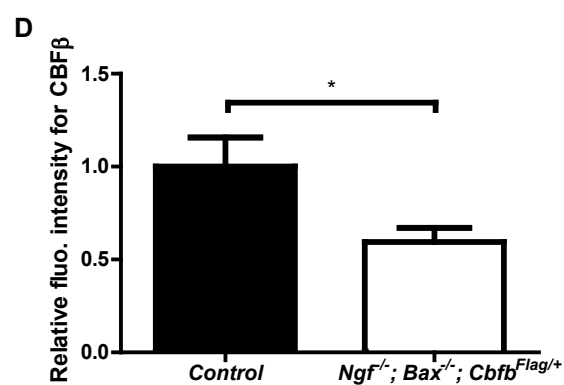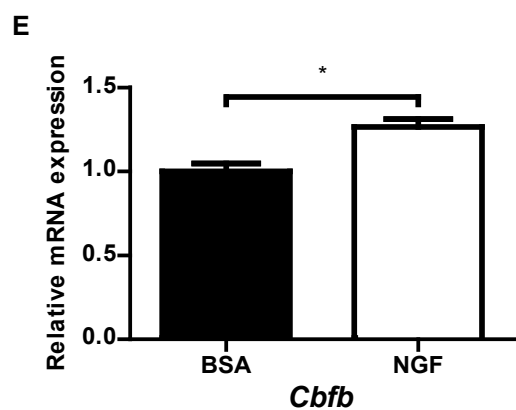

Supplement: supp [file elife-10874-supp-v1.zip]

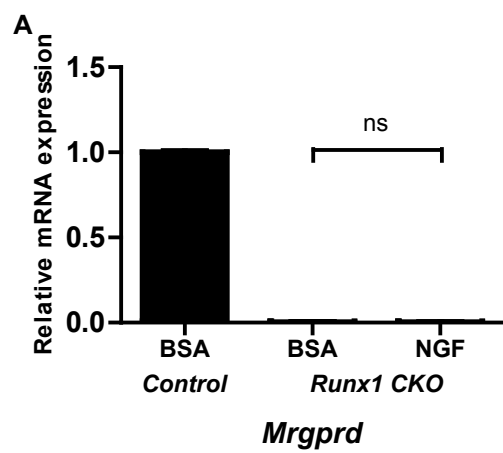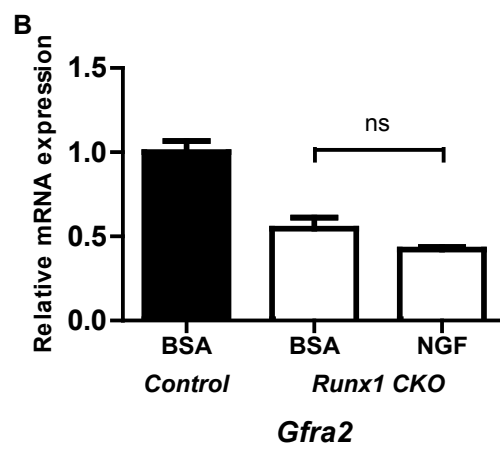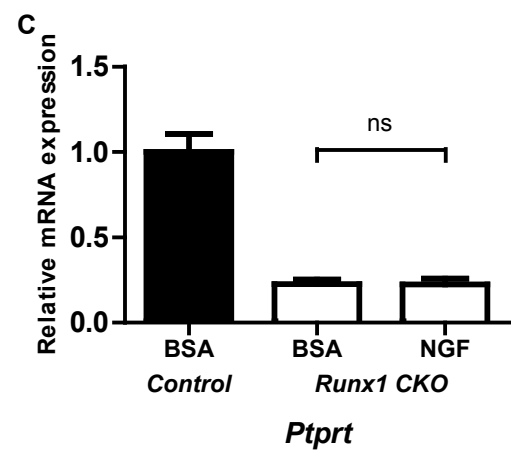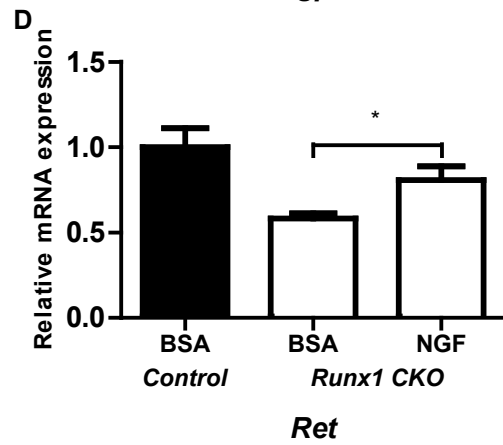

Supplement: supp [file elife-10874-supp-v1.zip]
